# Supplementary material
Source: PubMed Central journal article supplement (PMC4794060)

Appendix 2: Supplementary figures [posted as supplied by author]

Figure A: Coronary CTA angiographic findings and survival free of cardiovascular death.

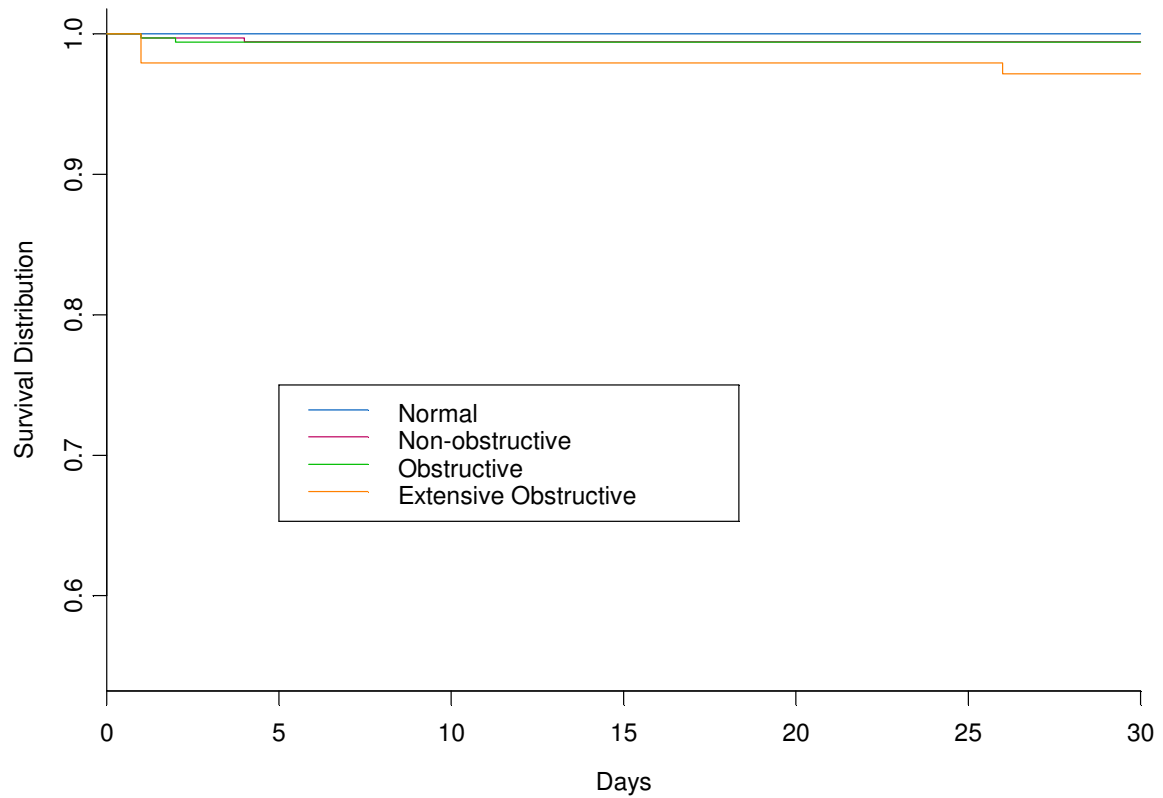

**Figure B: Coronary CTA angiographic findings and survival free of myocardial infarction.**

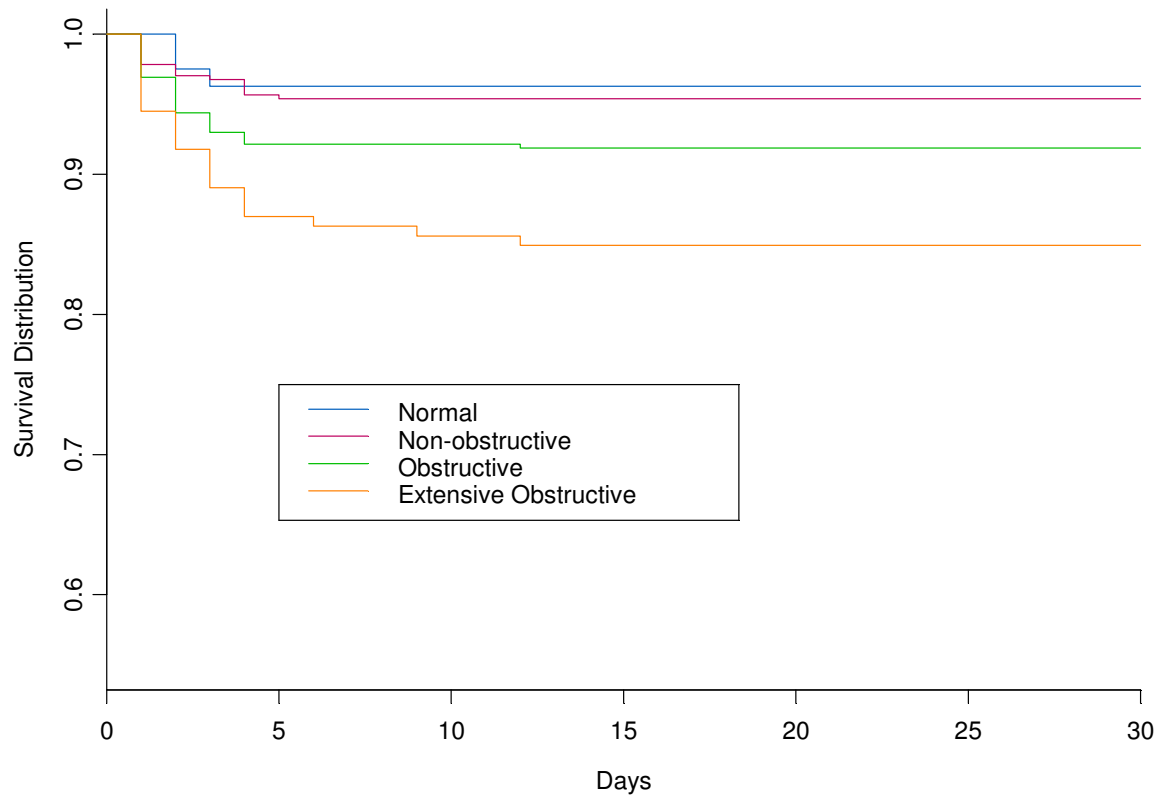

**Figure C: Preoperative coronary anatomy among patients experiencing a perioperative myocardial infarction**

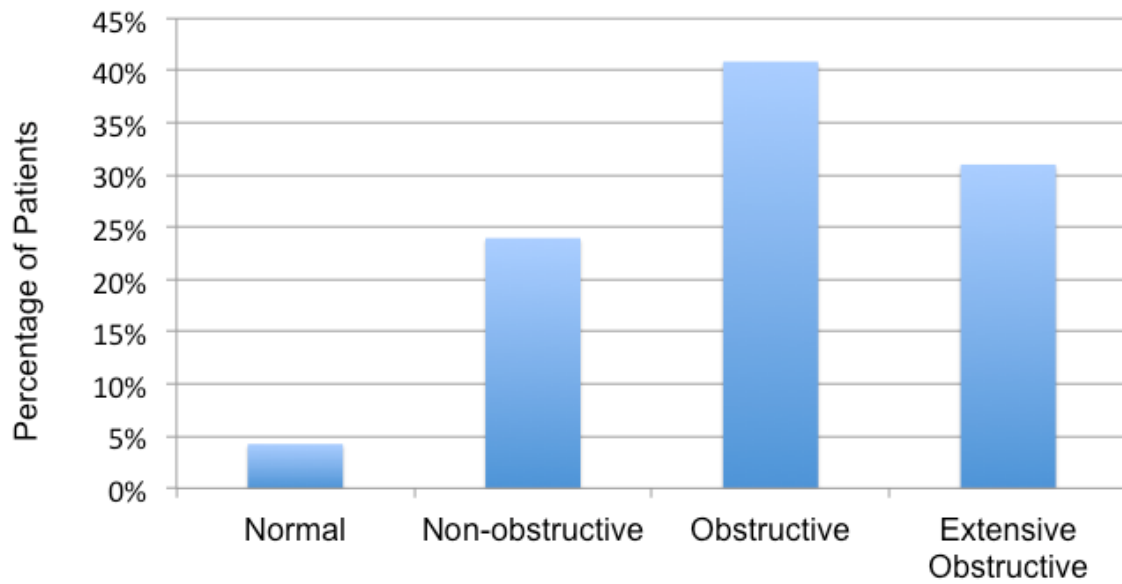

Supplement: shet024216.ww2_default.pdf [file shet024216.ww2_default.pdf]
