# Supplementary material
Source: PubMed Central journal article supplement (PMC4794060)
Supplement: shet024216.ww3_default.pdf [file shet024216.ww3_default.pdf]

**Appendix 3: Supplementary tables [posted as supplied by author]**

**Table A. Likelihood ratios associated with CCTA findings**

| CCTA finding          | Number of patients and percentage with CCTA finding among patients who suffered the primary outcome<br>N=74 | Number of patients and percentage with CCTA finding among patients who did not suffer the primary outcome<br>N=881 | Likelihood ratio | 95% CI    |
|-----------------------|-------------------------------------------------------------------------------------------------------------|--------------------------------------------------------------------------------------------------------------------|------------------|-----------|
| Normal                | 3 (4.1%)                                                                                                    | 78 (8.9%)                                                                                                          | 0.46             | 0.15-1.42 |
| Non-obstructive       | 19 (25.7%)                                                                                                  | 352 (40.0%)                                                                                                        | 0.64             | 0.43-0.95 |
| Obstructive           | 29 (39.2%)                                                                                                  | 328 (37.2%)                                                                                                        | 1.05             | 0.78-1.42 |
| Extensive obstructive | 23 (31.1%)                                                                                                  | 123 (14.0%)                                                                                                        | 2.23             | 1.53-3.24 |

**Table B. Models to predict 30-day cardiovascular death and myocardial infarction for patients without a prior history of coronary artery bypass graft surgery.**

| <b>Model with the RCRI score and CCTA variables, C=0.63 (95% CI, 0.56-0.70)</b> |     |           |                  |        |
|---------------------------------------------------------------------------------|-----|-----------|------------------|--------|
| <b>RCRI</b>                                                                     |     |           |                  |        |
| 0                                                                               | 320 | 15 (4.7)  | 1.00             | 0.21** |
| 1                                                                               | 353 | 25 (7.1)  | 1.46 (0.77-2.77) | -      |
| 2                                                                               | 143 | 13 (9.1)  | 1.75 (0.82-3.73) | 0.25   |
| ≥3                                                                              | 35  | 5 (14.3)  | 2.84 (1.01-7.96) | 0.15   |
| <b>CCTA</b>                                                                     |     |           |                  |        |
| Normal                                                                          | 81  | 3 (3.7)   | 1.00             | 0.22*  |
| Non-obstructive                                                                 | 371 | 19 (5.1)  | 1.48 (0.44-5.00) | -      |
| Obstructive                                                                     | 279 | 23 (8.2)  | 2.23 (0.67-7.44) | 0.53   |
| Extensive Obstructive                                                           | 120 | 13 (10.8) | 2.72 (0.77-9.60) | 0.19   |
|                                                                                 |     |           |                  | 0.12   |

\* Overall p-value for 4-category CCTA.

\*\* Overall p-value for 4-category RCRI.

CCTA = Coronary Computed Tomographic Angiography. RCRI = Revised Cardiac Risk Index.

**Table C. Risk reclassification for those who suffered the primary outcome and for those who did not suffer the primary outcome in the model that included CCTA findings compared to the model that only included the RCRI scores<sup>a</sup>**

| Models for 30 day probability of cardiovascular death and myocardial infarction |                                  |           |             |      |                                           |           |             |      |
|---------------------------------------------------------------------------------|----------------------------------|-----------|-------------|------|-------------------------------------------|-----------|-------------|------|
| Model that included CCTA findings                                               |                                  |           |             |      |                                           |           |             |      |
| RCRI scores only                                                                | <i>Patients who had an event</i> |           |             |      | <i>Patients who did not have an event</i> |           |             |      |
|                                                                                 | <5%                              | 5% to 10% | >10% to 15% | >15% | <5%                                       | 5% to 10% | >10% to 15% | >15% |
| <5%                                                                             | 5                                | 10        | 0           | 0    | 191                                       | 114       | 0           | 0    |
| 5-10%                                                                           | 0                                | 19        | 10          | 0    | 35                                        | 292       | 51          | 0    |
| >10- 15%                                                                        | 0                                | 12        | 0           | 7    | 12                                        | 110       | 0           | 37   |
| >15%                                                                            | 0                                | 0         | 1           | 10   | 0                                         | 3         | 7           | 29   |

<sup>a</sup> The CCTA risk reclassification for those who suffer the primary outcome was:  $(27-13)/74 = 18.9\%$ ; 95% CI, 2.2-35.7;  $p=0.03$ . The risk reclassification for those who did not suffer the primary outcome was:  $(167-202)/881 = -4.0\%$ ; 95% CI, -8.3- 0.30;  $p=0.07$ .

**Table D. Post hoc risk reclassification for those who suffered the primary outcome and for those who did not suffer the primary outcome in the model that included CCTA findings compared to the model that only included the RCRI scores that used the European Society of Cardiology risk categories**

| <b>Models for 30 day probability of cardiovascular death and myocardial infarction</b> |                                  |          |     |                                           |          |     |
|----------------------------------------------------------------------------------------|----------------------------------|----------|-----|-------------------------------------------|----------|-----|
| <b>Model that included CCTA findings</b>                                               |                                  |          |     |                                           |          |     |
|                                                                                        | <i>Patients who had an event</i> |          |     | <i>Patients who did not have an event</i> |          |     |
| <b>RCRI scores only</b>                                                                | <1%                              | 1% to 5% | >5% | <1%                                       | 1% to 5% | >5% |
| <1%                                                                                    | 0                                | 0        | 0   | 0                                         | 0        | 0   |
| 1% to 5%                                                                               | 0                                | 5        | 10  | 0                                         | 191      | 114 |
| >5%                                                                                    | 0                                | 0        | 59  | 0                                         | 47       | 529 |

<sup>a</sup> The CCTA risk reclassification for those who suffer the primary outcome was:  $(10-0)/74 = 13.5\%$ ; 95% CI, 5.1-21.9%;  $p=0.002$ . The risk reclassification for those who did not suffer the primary outcome was:  $(47-114)/881 = -7.6\%$ ; 95% CI, -10.4 - -4.8;  $p<0.001$ .

**Table E. Post hoc sensitivity model to predict 30-day cardiovascular death and myocardial infarction that used a 70% stenosis to define obstructive and extensive obstructive coronary artery disease**

| <b>Model with the CCTA findings and Revised Cardiac Risk Index scores, C=0.68; 95% CI, 0.62-0.74</b> |                           |                                          |                            |                     |
|------------------------------------------------------------------------------------------------------|---------------------------|------------------------------------------|----------------------------|---------------------|
|                                                                                                      | <b>Number of Patients</b> | <b>Number of Patients with Event (%)</b> | <b>Hazard Ratio 95% CI</b> | <b>P-value</b>      |
| RCRI scores                                                                                          |                           |                                          |                            | 0.027 <sup>a</sup>  |
| 0                                                                                                    | 320                       | 15 (4.7)                                 | 1.00                       | -                   |
| 1                                                                                                    | 407                       | 29 (7.1)                                 | 1.32 (0.70, 2.48)          | 0.397               |
| 2                                                                                                    | 178                       | 19 (10.7)                                | 1.64 (0.80, 3.32)          | 0.174               |
| ≥3                                                                                                   | 50                        | 11 (22.0)                                | 3.34 (1.47, 7.56)          | 0.004               |
| CCTA findings                                                                                        |                           |                                          |                            | <0.001 <sup>b</sup> |
| Normal                                                                                               | 81                        | 3 (3.7)                                  | 1.00                       | -                   |
| Non-obstructive                                                                                      | 489                       | 24 (4.9)                                 | 1.41 (0.42, 4.67)          | 0.578               |
| Obstructive                                                                                          | 296                       | 27 (9.1)                                 | 2.27 (0.69, 7.52)          | 0.179               |
| Extensive Obstructive                                                                                | 89                        | 20 (22.5)                                | 5.49 (1.61, 18.71)         | 0.006               |

<sup>a</sup> Overall p-value for 4-category Revised Cardiac Risk Index

<sup>b</sup> Overall p-value for 4-category CCTA.

CCTA = Coronary Computed Tomographic Angiography. RCRI = Revised Cardiac Risk Index.

**Table F. Post hoc risk reclassification for those who suffered the primary outcome and for those who did not suffer the primary outcome in the model that included CCTA findings compared to the model that only included the RCRI scores that used a 70% stenosis to define obstructive and extensive obstructive coronary artery disease**

| <b>Models for 30 day probability of cardiovascular death and myocardial infarction</b> |                                  |           |      |                                           |           |      |
|----------------------------------------------------------------------------------------|----------------------------------|-----------|------|-------------------------------------------|-----------|------|
| <b>Model that included CCTA findings</b>                                               |                                  |           |      |                                           |           |      |
|                                                                                        | <i>Patients who had an event</i> |           |      | <i>Patients who did not have an event</i> |           |      |
| <b>RCRI scores only</b>                                                                | <5%                              | 5% to 15% | >15% | <5%                                       | 5% to 15% | >15% |
| <5%                                                                                    | 6                                | 9         | 0    | 240                                       | 65        | 0    |
| 5% to 15%                                                                              | 0                                | 33        | 15   | 47                                        | 440       | 50   |
| >15%                                                                                   | 0                                | 1         | 10   | 0                                         | 13        | 26   |

<sup>a</sup> The CCTA risk reclassification for those who suffer the primary outcome was:  $(24-1)/74 = 31.1$ ; 95% CI, 17.8-44.3%;  $p < 0.001$ . The risk reclassification for those who did not suffer the primary outcome was:  $(60-115)/881 = -6.2$ %; 95% CI, -9.2- -3.3;  $p < 0.001$ .

**Table G. Post hoc risk reclassification for those who suffered the primary outcome and for those who did not suffer the primary outcome in the model that included CCTA findings compared to the model that only included the RCRI scores. Including only patients with 1 or 2 of the following: history of CAD, age >70, diabetes requiring treatment**

| <b>Models for 30 day probability of cardiovascular death and myocardial infarction</b> |                                  |           |      |                                           |           |      |
|----------------------------------------------------------------------------------------|----------------------------------|-----------|------|-------------------------------------------|-----------|------|
| <b>Model that included CCTA findings</b>                                               |                                  |           |      |                                           |           |      |
|                                                                                        | <i>Patients who had an event</i> |           |      | <i>Patients who did not have an event</i> |           |      |
| <b>RCRI scores only</b>                                                                | <5%                              | 5% to 15% | >15% | <5%                                       | 5% to 15% | >15% |
| <5%                                                                                    | 2                                | 8         | 0    | 160                                       | 100       | 0    |
| 5% to 15%                                                                              | 0                                | 33        | 3    | 34                                        | 338       | 27   |
| >15%                                                                                   | 0                                | 0         | 8    | 0                                         | 8         | 20   |

<sup>a</sup> The CCTA risk reclassification for those who suffer the primary outcome was:  $(11-0)/54 = 20.4\%$ ; 95% CI, 8.3 - 32.4;  $p < 0.001$ . The risk reclassification for those who did not suffer the primary outcome was:  $(42-127)/687 = -12.4\%$ ; 95% CI, -16.1 - -8.7;  $p < 0.001$ .
